# Supplementary material
Source: Springer Nature journal article supplement (https://www.springermedizin.de/resource/supplementary/12874_2012_884_MOESM2_ESM.pdf/9433100)

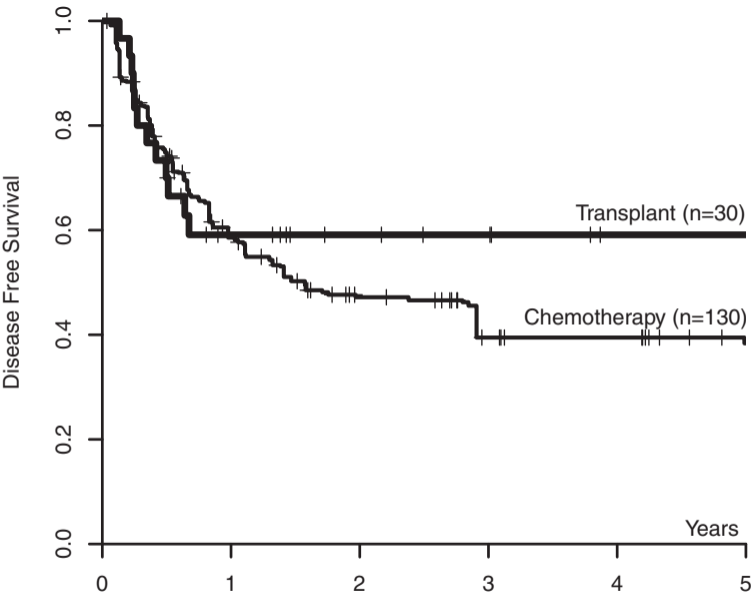

Pts at risk (events):

|       |     |      |    |      |    |     |    |  |    |     |    |
|-------|-----|------|----|------|----|-----|----|--|----|-----|----|
| BMT   | 30  | (12) | 14 |      | 9  |     | 7  |  | 3  |     | 3  |
| Chemo | 130 | (37) | 77 | (15) | 51 | (4) | 39 |  | 36 | (1) | 28 |

Supplement: MOESM2 [file 9433100]
